# Supplementary material for: Leucism and updated geographic distribution of Molossus nigricans Miller, 1902 (Chiroptera: Molossidae) in Honduras
Source: publisher site journal article supplement (doi:10.1515/mammalia-2019-0153), 2020-09-14
Supplement: Supplementary file 1 [file j_mammalia-2019-0153_suppl.docx]

## Supplementary material

**Leucism and updated geographic distribution of *Molossus nigricans* Miller, 1902 (Chiroptera: Molossidae) in Honduras**

Wilson Gómez-Corea, Jonathan Hernández, Cristopher Antúnez-Fonseca, David Mejía-Quintanilla and Hermes Vega

DOI 10.1515/mammalia-2019-0153

## Supplementary Appendix 1: Records of Molossus nigricans obtained in online database Global Biodiversity Information Facility (https://www.gbif.org/), but not examined by us. The voucher material number is given, for future reference.

## American Museum of Natural History (AMNH, New York, USA) Cortés departament (AMNH- 123306 at 123319): collected by C.F. Underwood on 27 January 1933 at the Penitas, San Pedro Sula. Ocotepeque departament (AMNH-126850 at 126853): collected by C.F. Underwood on 24 March 1937 at the Chorro, Sinuapa. La Paz departament (AMNH-126831 at 126848, 126860): collected by C.F. Underwood on 20 at 23 March 1937 at the Cruz Grande, (AMNH-126825, 126826): collected by C.F. Underwood on 27 March 1937 at the Encuentros, (AMNH- 126857 al 126861): collected by C.F. Underwood on 29 and 30 March 1997 at the Manteado, San Jose. (AMNH- 126812 at 126824): collected by C.F. Underwood on 18 and 19 March 1937 at the Pedrero, Santa Elena. Francisco Morazán departament (AMNH- 126821, 127577): collected by C.F. Underwood on 14 July 1937 at the Picacho, Distrito Central.

Biodiversity Research and Teaching Collections- TCWC Vertebrates. Copán department (TCWC - 19856 to 19860, 19865 to 19867): collected by J.T. Webb on 8 March 1967 at Copán. (TCWC - 19847 at 19855, 19862, 19863 and 19886): collected by D.C. Carter on 9 March 1967 at Copán. (TCWC - 19864): collected byR.K. LaVal on 7 March 1967 at Copán.. Ocotepeque department (TCWC - 19831 at 19834, 19844, 19845 and 17953): collected by D.C. Carter on 19 April and 19 February 1966 at Nueva Ocotepeque. (TCWC - 19840 at 19843): collected by J.T Webb on 19 February 1966 on Nueva Ocotepeque. (TCWC - 19836 at 19839 and 19846): collected by R.K. LaVal on 19 February 1966 at Nueva Ocotepeque. Atlántida department (TCWC - 24139 to 24150): collected by R. Valdes on 2 August 1969 at Lancetilla. (TCWC - 24128 at 24138 and 24148): collected by R.K LaVal on 2 August 1969 on Lancetilla. (TCWC - 49765 at 49769): collected by R.D. Bradley on 24 June 1983 at Lancetilla. (TCWC -14780): collected by D.L. Mankins on 5 December 1964 at Tela. (TCWC -14781 at 14788): collected by J.V. Mankins on 1 February 1964 at the Ceiba. Cortés department (TCWC - 11064 at 11070): collected by H.E. Ostmark, G.H. Jarrell and J.V. Mankins on 26 February 1962 and 17 July 1963 at the Lima. (TCWC - 14789 at 14795): collected by J.V. Mankins on 3 and 4 November 1964 at San Pedro Sula. Santa Bárbara department (TCWC -19868 at 19878): collected by D.C. Carter on 1 April 1967 at Santa Bárbara. (TCWC - 20630): collected by D.C. Carter on 31 March 1967 at Santa Bárbara. Yoro department (TCWC - 19879 at 19884): collected by D.C Carter on 19 and 21 March 1967 at Yoro. Comayagua department (TCWC - 22172 at 22176): collected by T.C. Maxwell on 28 July 1967 at Comayagua. (TCWC - 22160 at 22171): collected by R.K. LaVal on 3, 5 and 8 August 1967 at Comayagua. El Paraíso department (TCWC - 22177): collected by T.C. Maxwell on 22 Augost 1967 at Chichicaste. Olancho department (TCWC - 49770 at 49772): collected by R.D. Bradley et al. on 18 June 1983 at Catacamas.

## [California State University, Long Beach Mammals](https://www.gbif.org/dataset/431b19b9-b5b4-4bcb-ae11-072899dd4c52). Atlantida departament (CSULB - 5368): collected by J. Mankins on 20 October 1964 at Tela.

## [Charles R. Conner Museum](https://www.gbif.org/publisher/7c7b6440-94d1-11dd-bdb1-b8a03c50a862), [CRCM Vertebrate Collection](https://www.gbif.org/dataset/3a339645-d3b4-40aa-b891-f9c92dc554d8). Cortés departament (CRCM- 65-133, 66-83 at 66-85): collected by Geo. E. Hudson on 1, 5 and 30 July 1965 at the Lima.

## [Field Museum of Natural History (Zoology) Mammal Collection](https://www.gbif.org/dataset/41fc5c40-5e81-496f-9733-6b5681b3b7a5). Islas de la Bahía departament (FMNH- 49862 at 49868): collected by D.D. Davis on 9 February 1940 at Coxen Hole (La. 16.299999, Lo. -86.550003), Roatán.

## University of Kansas Biodiversity Institute Mammalogy Collection, [KUBI Mammalogy Collection](https://www.gbif.org/dataset/1d04e739-98a9-4e16-9970-8f8f3bf9e9e3). Cortés departament (KUM-103264): collected by G.E. Hudson on 30 1967 at the Lima.

Museum of Texas Tech University, [(TTU)](https://www.gbif.org/publisher/acac73b0-055d-11d8-b84f-b8a03c50a862) [Mammals Collection](https://www.gbif.org/dataset/854f70cc-55e3-4af2-9417-0f47d6c7902d). Yoro department (TTU - 29447 ): collected by P.G. Dolan on 23 July 1977 at catholic church Yoro (15.1333 -87.133301). (TTU - 29427 at 29446): collected by P.G. Dolan 24 July 1977 at Santa Rita. Cortés department (TTU- 29394 to 29400 ): collected by P.G. Dolan on 21 July 1977 at San Fransisco de Yojoa (15.0167 -87.966698). (TTU-104414): collected by R.D Bradley et al. on 23 July 2004 at the Guama (6 1649092 395886). Santa Bárbara department (TTU - 29401 at 29407): collected by D.C. Carter on 22 July 1977 at Santa Barbara (14.91667-88.23333). (TTU - 29408 at 29426): collected by P.G. Dolan on 22 July 1977 at Santa Barbara (14.91667 -88.23333). Colón department (TTU - 104248 at 104250,104253, 104170, 104174 and 104175 ): collected by R.D. Bradley, N.D. Durish, J.D. Hanson, F. Mendez-H, L.K. Longhofer and R.A. Van Den Bussche on 17 and 19 July 2004 at Parque Nacional Capiro y Calentura. Atlántida department (TTU-104081 ): collected by R.D Bradley on 21 July 2004 at Ceiba.
